# Supplementary material for: A combined crossed molecular beams and ab initio investigation on the formation of vinylsulfidoboron (C2H311B32S)
Source: Royal Society of Chemistry journal article supplement (doi:10.1039/c4cp01651c), 2014-01-01
Supplement: c4cp01651c1.pdf [file c4cp01651c1.pdf]

## Supporting Information

for

### **A Combined Crossed Molecular Beams and ab Initio Investigation on the Formation of Vinylsulfidoboron ( $C_2H_3^{11}B^{32}S$ )**

by

Tao Yang, Beni B. Dangi, Dorian S. N. Parker, Ralf I. Kaiser\*

*Department of Chemistry, University of Hawaii at Manoa, Honolulu, Hawaii 96822, USA*

Yi An, Agnes H. H. Chang

*Department of Chemistry, National Dong Hwa University, Shoufeng, Hualien 974, Taiwan*

\* Corresponding Author:

Professor Dr. Ralf I. Kaiser; E-mail: [ralfk@hawaii.edu](mailto:ralfk@hawaii.edu); Phone: 808-956-5731

List of Contents:

Table S1. The calculated energies for the B3LYP/cc-pVTZ optimized geometries of collision complexes, intermediates, transition states, and dissociation products for the BS + C<sub>2</sub>H<sub>4</sub> reaction on the adiabatic doublet ground state potential energy surface of C<sub>2</sub>H<sub>4</sub>BS has been demonstrated.....3

Table S2. Optimized Cartesian coordinates (Å), rotational constants (GHz), and vibrational frequencies (cm<sup>-1</sup>) of reactants, intermediates, transition states, and dissociation products computed with the B3LYP/cc-pVTZ for the BS + C<sub>2</sub>H<sub>4</sub> reaction on the adiabatic doublet ground state potential energy surface of C<sub>2</sub>H<sub>4</sub>BS.....4

Table S3. The calculated energies for the B3LYP/aug-cc-pVTZ optimized geometries of collision complexes, intermediates, transition states, and dissociation products for the BS + C<sub>2</sub>H<sub>4</sub> reaction on the adiabatic doublet ground state potential energy surface of C<sub>2</sub>H<sub>4</sub>BS has been demonstrated.....7

Table S4. Optimized Cartesian coordinates (Å), rotational constants (GHz), and vibrational frequencies (cm<sup>-1</sup>) of reactants, intermediates, transition states, and dissociation products computed with the B3LYP/au-gcc-pVTZ for the BS + C<sub>2</sub>H<sub>4</sub> reaction on the adiabatic doublet ground state potential energy surface of C<sub>2</sub>H<sub>4</sub>BS.....8

Table S5. The RRKM rate constants (s<sup>-1</sup>) computed with B3LYP/cc-pVTZ frequencies and CCSD(T)/cc-pVTZ energies at collision energies of 0.0, 0.1, 0.6, 8.4, 18.0, 21.0, and 41.8 kJ/mol, in the reaction of boron monosulfide (BS; X<sup>2</sup>Σ<sup>+</sup>) with ethylene (C<sub>2</sub>H<sub>4</sub>; X<sup>1</sup>A<sub>g</sub>).....11

Table S1. The calculated energies for the B3LYP/cc-pVTZ optimized geometries of collision complexes, intermediates, transition states, and dissociation products for the BS + C<sub>2</sub>H<sub>4</sub> reaction on the adiabatic doublet ground state potential energy surface of C<sub>2</sub>H<sub>4</sub>BS has been demonstrated.

|                      | B3LYP/<br>cc-pVTZ + E <sub>zpc</sub> <sup>a</sup> | E <sub>zpc</sub> <sup>b</sup> | CCSD(T)/<br>cc-pVTZ      | E <sup>c</sup><br>(kJ/mol) | E <sup>d</sup><br>(kJ/mol) |
|----------------------|---------------------------------------------------|-------------------------------|--------------------------|----------------------------|----------------------------|
| <b>BS + ethylene</b> | -501.582274                                       | 0.053608                      | -500.892256              | 0.0                        | 0.0                        |
| i1                   | -501.650433                                       | 0.055193                      | -500.960618              | -178.9                     | -175.1                     |
| i2                   | -501.668800                                       | 0.056540                      | -500.976136              | -226.9                     | -212.3                     |
| p1+H                 | -501.597208                                       | 0.047060                      | -500.900561              | -39.3                      | -38.9                      |
| p2+H                 | -501.468298                                       | 0.043565                      | -500.784834              | 236.1                      | 255.4                      |
| p3+H                 | -501.492187                                       | 0.044859                      | -500.778552              | 298.9                      | 275.4                      |
| tsi1p1               | -500.767424 <sup>e</sup>                          | 0.049603 <sup>f</sup>         | -500.894638 <sup>g</sup> | -12.5 <sup>h</sup>         | -18.4                      |
| tsi1i2               | -501.604443                                       | 0.052196                      | -500.907124              | -58.1                      | -42.6                      |
| tsi2p1               | -501.596048                                       | 0.047821                      | -500.898366              | -35.9                      | -31.4                      |

<sup>a</sup> B3LYP/cc-pVTZ energy with zero-point energy correction in hartree.

<sup>b</sup> zero-point energy by B3LYP/cc-pVTZ.

<sup>c</sup> relative energy by B3LYP/cc-pVTZ with zero-point energy correction.

<sup>d</sup> relative energy by CCSD(T)/cc-pVTZ with B3LYP/cc-pVTZ zero-point energy correction.

<sup>e</sup> mp2/cc-pVTZ energy with zero-point energy correction in hartree.

<sup>f</sup> zero-point energy by mp2/cc-pVTZ.

<sup>g</sup> relative energy by CCSD(T)/cc-pVTZ with mp2/cc-pVTZ zero-point energy correction.

<sup>h</sup> relative energy by MP2/cc-pVTZ with zero-point energy correction.

Table S2. Optimized Cartesian coordinates (Å), rotational constants (GHz), and vibrational frequencies (cm<sup>-1</sup>) of reactants, intermediates, transition states, and dissociation products computed at the cc-pVTZ basis set for the BS + C<sub>2</sub>H<sub>4</sub> reaction on the adiabatic doublet ground state potential energy surface of C<sub>2</sub>H<sub>4</sub>BS.

| Species                                                                                                                                                             | Rotational Constants (GHz)          | Vibrational Frequencies (cm <sup>-1</sup> )                                                                    | Cartesian Coordinates (Å) |           |           |           |
|---------------------------------------------------------------------------------------------------------------------------------------------------------------------|-------------------------------------|----------------------------------------------------------------------------------------------------------------|---------------------------|-----------|-----------|-----------|
|                                                                                                                                                                     |                                     |                                                                                                                | Atom                      | X         | Y         | Z         |
| BS (C <sub>∞v</sub> , <sup>2</sup> Σ <sup>+</sup> )<br>                            | 23.718417                           | 1181                                                                                                           | B                         | 0.000000  | 0.000000  | -1.228970 |
|                                                                                                                                                                     |                                     |                                                                                                                | S                         | 0.000000  | 0.000000  | 0.384053  |
| C <sub>2</sub> H <sub>4</sub> (D <sub>2h</sub> , <sup>1</sup> A <sub>g</sub> )<br> | 147.87034,<br>30.38348,<br>25.20459 | 837, 979, 984, 1067,<br>1247, 1382, 1479, 1693,<br>3125, 3139, 3194, 3222                                      | C                         | 0.000000  | 0.000000  | 0.662029  |
|                                                                                                                                                                     |                                     |                                                                                                                | C                         | 0.000000  | 0.000000  | -0.662029 |
|                                                                                                                                                                     |                                     |                                                                                                                | H                         | 0.000000  | 0.920758  | 1.231574  |
|                                                                                                                                                                     |                                     |                                                                                                                | H                         | 0.000000  | -0.920758 | 1.231574  |
|                                                                                                                                                                     |                                     |                                                                                                                | H                         | 0.000000  | 0.920758  | -1.231574 |
|                                                                                                                                                                     |                                     |                                                                                                                | H                         | 0.000000  | -0.920758 | -1.231574 |
| i1(C <sub>s</sub> , <sup>2</sup> A')<br>                                         | 25.19982,<br>2.66255,<br>2.48618    | 132, 166, 305, 428, 536,<br>671, 736, 972, 1047,<br>1195, 1245, 1426, 1431,<br>1465, 3007, 3048, 3154,<br>3261 | C                         | -1.475418 | -0.103358 | 0.000000  |
|                                                                                                                                                                     |                                     |                                                                                                                | C                         | -1.537115 | -1.596012 | 0.000000  |
|                                                                                                                                                                     |                                     |                                                                                                                | H                         | -1.969664 | 0.319140  | 0.880492  |
|                                                                                                                                                                     |                                     |                                                                                                                | H                         | -1.969664 | 0.319140  | -0.880492 |
|                                                                                                                                                                     |                                     |                                                                                                                | H                         | -1.462731 | -2.143917 | 0.926978  |
|                                                                                                                                                                     |                                     |                                                                                                                | H                         | -1.462731 | -2.143917 | -0.926978 |
|                                                                                                                                                                     |                                     |                                                                                                                | B                         | 0.000000  | 0.341599  | 0.000000  |
|                                                                                                                                                                     |                                     |                                                                                                                | S                         | 1.558749  | 0.758611  | 0.000000  |
| i2(C <sub>1</sub> , <sup>2</sup> A)<br>                                          | 37.15961,<br>2.38026,<br>2.26792    | 117, 150, 313, 484, 636,<br>672, 984, 987, 1097,<br>1274, 1392, 1463, 1473,<br>1508, 2996, 3029, 3109,<br>3133 | C                         | -1.192212 | 0.581766  | 0.000026  |
|                                                                                                                                                                     |                                     |                                                                                                                | C                         | -2.313478 | -0.403091 | 0.000042  |
|                                                                                                                                                                     |                                     |                                                                                                                | H                         | -1.478596 | 1.629530  | 0.000808  |
|                                                                                                                                                                     |                                     |                                                                                                                | H                         | -2.955442 | -0.255856 | 0.875141  |

|                                                                                                                                |                                  |                                                                                                                   |                                                                                                                                                                                                                                                                            |
|--------------------------------------------------------------------------------------------------------------------------------|----------------------------------|-------------------------------------------------------------------------------------------------------------------|----------------------------------------------------------------------------------------------------------------------------------------------------------------------------------------------------------------------------------------------------------------------------|
|                                                                                                                                |                                  |                                                                                                                   | H -2.956774 -0.254636 -0.873861<br>B 0.241375 0.249743 -0.000732<br>S 1.824108 -0.125323 0.000128<br>H -1.967647 -1.434633 -0.000879                                                                                                                                       |
| tsi1i2(C <sub>1</sub> , <sup>2</sup> A)<br>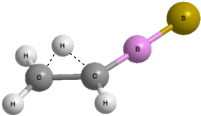   | 39.00509,<br>2.40294,<br>2.28797 | 1675 i, 156, 255, 479,<br>493, 663, 705, 778, 997,<br>1110, 1205, 1282, 1447,<br>1526, 2215, 3150, 3165,<br>3284  | C 1.228344 0.544982 -0.018101<br>C 2.332535 -0.446842 -0.050764<br>H 1.529858 1.573964 -0.178028<br>H 1.779968 0.158130 1.032210<br>H 3.340960 -0.111029 -0.227420<br>H 2.111764 -1.501544 -0.029351<br>B -0.227448 0.227970 -0.029421<br>S -1.811912 -0.115513 -0.002320  |
| tsi1p1(C <sub>1</sub> , <sup>2</sup> A)<br> | 31.81362,<br>2.53283,<br>2.41037 | 1168 i, 159, 244, 344,<br>451, 491, 629, 684,<br>1046, 1057, 1100, 1304,<br>1405, 1521, 1641, 3194,<br>3206, 3296 | C -1.320139 0.472143 -0.167264<br>C -2.212953 -0.503855 0.034105<br>H -1.044902 1.418985 1.418564<br>H -1.656781 1.412744 -0.585414<br>H -3.269518 -0.343763 -0.123880<br>H -1.912114 -1.477031 0.393042<br>B 0.180249 0.206159 -0.065923<br>S 1.761289 -0.115716 0.001641 |
| tsi2p1(C <sub>1</sub> , <sup>2</sup> A)<br> | 30.54037,<br>2.40473,<br>2.31939 | 275 i, 129, 170, 197,<br>307, 491, 637, 674,<br>1005, 1024, 1045, 1300,<br>1387, 1499, 1638, 3128,<br>3138, 3222  | C -1.226810 -0.581131 0.089377<br>C -2.201733 0.257706 -0.294348<br>H -1.506401 -1.564017 0.457710<br>H -3.243244 -0.035768 -0.274124<br>H -2.870536 1.470338 1.626017<br>B 0.238757 -0.233905 0.042092                                                                    |

|                                                                                                                            |                                  |                                                                                              |                                                                                                                                                                                                                                           |
|----------------------------------------------------------------------------------------------------------------------------|----------------------------------|----------------------------------------------------------------------------------------------|-------------------------------------------------------------------------------------------------------------------------------------------------------------------------------------------------------------------------------------------|
|                                                                                                                            |                                  |                                                                                              | S 1.811446 0.124881 -0.006285<br>H -1.985486 1.241422 -0.689673                                                                                                                                                                           |
| <p>p1(C<sub>s</sub>,<sup>1</sup>A')</p> 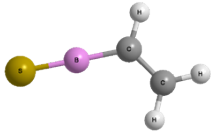  | 46.31678,<br>2.56772,<br>2.43284 | 165, 273, 491, 620, 673,<br>1014, 1033, 1044, 1302,<br>1396, 1501, 1662, 3126,<br>3134, 3217 | C 1.380472 -0.344007 0.000000<br>C 1.603936 -1.662236 0.000000<br>H 2.234667 0.327127 0.000000<br>H 2.607425 -2.069033 0.000000<br>H 0.793015 -2.379257 0.000000<br>B 0.000000 0.264307 0.000000<br>S -1.471347 0.927318 0.000000         |
| <p>p2(C<sub>1</sub>,<sup>1</sup>A)</p>    | 93.44812,<br>2.22349,<br>2.19996 | 108, 158, 354, 369, 582,<br>670, 1038, 1180, 1306,<br>1340, 1504, 1587, 2894,<br>2988, 3044  | C -1.179583 -0.387281 -0.024438<br>C -2.503236 0.151444 -0.021832<br>H -2.646184 1.133386 -0.487173<br>H -2.627826 0.327437 1.069224<br>B 0.213366 -0.082095 -0.009372<br>S 1.850323 0.056837 0.002177<br>H -3.301070 -0.544713 -0.292407 |
| <p>p3(C<sub>1</sub>,<sup>1</sup>A)</p>  | 13.45857,<br>5.15273,<br>4.11598 | 131, 203, 394, 610, 680,<br>749, 971, 994, 1043,<br>1300, 1416, 1632, 3144,<br>3184, 3238    | C 0.743138 -0.481376 0.323448<br>C 1.724599 0.231116 -0.220783<br>H 1.559572 0.902047 -1.051028<br>H 0.911311 -1.150460 1.155698<br>H 2.735806 0.136098 0.153953<br>B -0.888406 1.403001 0.367905<br>S -0.973193 -0.337570 -0.169634      |

Table S3. The calculated energies for the B3LYP/aug-cc-pVTZ optimized geometries of collision complexes, intermediates, transition states, and dissociation products for the BS + C<sub>2</sub>H<sub>4</sub> reaction on the adiabatic doublet ground state potential energy surface of C<sub>2</sub>H<sub>4</sub>BS has been demonstrated.

|                      | B3LYP/<br>cc-pVTZ + E <sub>zpc</sub> <sup>a</sup> | B3LYP/<br>aug-cc-pVTZ + E <sub>zpc</sub> | E <sup>b</sup><br>(kJ/mol) | E <sup>c</sup><br>(kJ/mol) |
|----------------------|---------------------------------------------------|------------------------------------------|----------------------------|----------------------------|
| <b>BS + ethylene</b> | -501.582274                                       | (-501.583695)                            | 0.0                        |                            |
| i1                   | -501.650433                                       | (-501.651728)                            | -178.9                     | (-178.5)                   |
| i2                   | -501.668800                                       | (-501.669932)                            | -226.9                     | (-226.2)                   |
| p1+H                 | -501.597208                                       | (-501.598511)                            | -39.3                      | (-38.9)                    |
| p2+H                 | -501.468298                                       | (-501.492291)                            | 236.1                      | (239.8)                    |
| p3+H                 | -501.492187                                       | (-501.469833)                            | 298.9                      | (298.7)                    |
| tsi1p1               | -500.767424 <sup>d</sup>                          | (-500.777908) <sup>e</sup>               | -12.5 <sup>f</sup>         | (-15.2) <sup>g</sup>       |
| tsi1i2               | -501.604443                                       | (-501.60607)                             | -58.1                      | (-58.7)                    |
| tsi2p1               | -501.596048                                       | (-501.597293)                            | -35.9                      | (-35.7)                    |

<sup>a</sup> B3LYP/cc-pVTZ energy with zero-point energy correction in hartree.

<sup>b</sup> relative energy by B3LYP/cc-pVTZ with zero-point energy correction.

<sup>c</sup> relative energy by B3LYP/aug-cc-pVTZ with zero-point energy correction.

<sup>d</sup> mp2/cc-pVTZ energy with zero-point energy correction in hartree.

<sup>e</sup> mp2/aug-cc-pVTZ energy with zero-point energy correction in hartree.

<sup>f</sup> relative energy by MP2/cc-pVTZ with zero-point energy correction.

<sup>g</sup> relative energy by MP2/aug-cc-pVTZ with zero-point energy correction.

Table S4. Optimized Cartesian coordinates (Å), rotational constants (GHz), and vibrational frequencies (cm<sup>-1</sup>) of reactants, intermediates, transition states, and dissociation products computed at the aug-cc-pVTZ basis set for the BS + C<sub>2</sub>H<sub>4</sub> reaction on the adiabatic doublet ground state potential energy surface of C<sub>2</sub>H<sub>4</sub>BS.

| Species                                                                                                                                                             | Rotational Constants (GHz)          | Vibrational Frequencies (cm <sup>-1</sup> )                                                                    | Cartesian Coordinates (Å) |           |           |           |
|---------------------------------------------------------------------------------------------------------------------------------------------------------------------|-------------------------------------|----------------------------------------------------------------------------------------------------------------|---------------------------|-----------|-----------|-----------|
|                                                                                                                                                                     |                                     |                                                                                                                | Atom                      | X         | Y         | Z         |
| BS (C <sub>∞v</sub> , <sup>2</sup> Σ <sup>+</sup> )<br>                            | 23.724916                           | 1179                                                                                                           | B                         | 0.000000  | 0.000000  | -1.228970 |
|                                                                                                                                                                     |                                     |                                                                                                                | S                         | 0.000000  | 0.000000  | 0.384053  |
| C <sub>2</sub> H <sub>4</sub> (D <sub>2h</sub> , <sup>1</sup> A <sub>g</sub> )<br> | 147.91079,<br>30.35661,<br>25.18727 | 835, 979, 985, 1060,<br>1245, 1381, 1480, 1689,<br>3126, 3140, 3195, 3223                                      | C                         | 0.000000  | 0.000000  | 0.662414  |
|                                                                                                                                                                     |                                     |                                                                                                                | C                         | 0.000000  | 0.000000  | -0.662414 |
|                                                                                                                                                                     |                                     |                                                                                                                | H                         | 0.000000  | 0.920632  | 1.231825  |
|                                                                                                                                                                     |                                     |                                                                                                                | H                         | 0.000000  | -0.920632 | 1.231825  |
|                                                                                                                                                                     |                                     |                                                                                                                | H                         | 0.000000  | 0.920632  | -1.231825 |
|                                                                                                                                                                     |                                     |                                                                                                                | H                         | 0.000000  | -0.920632 | -1.231825 |
| i1(C <sub>s</sub> , <sup>2</sup> A')<br>                                         | 25.22074,<br>2.66199,<br>2.48589    | 131, 166, 305, 428, 540,<br>671, 735, 971, 1046,<br>1194, 1245, 1423, 1429,<br>1465, 3006, 3047, 3154,<br>3259 | C                         | -1.474996 | -0.104508 | 0.000000  |
|                                                                                                                                                                     |                                     |                                                                                                                | C                         | -1.536251 | -1.597003 | 0.000000  |
|                                                                                                                                                                     |                                     |                                                                                                                | H                         | -1.969354 | 0.317577  | 0.880470  |
|                                                                                                                                                                     |                                     |                                                                                                                | H                         | -1.969354 | 0.317577  | -0.880470 |
|                                                                                                                                                                     |                                     |                                                                                                                | H                         | -1.463814 | -2.145089 | 0.926956  |
|                                                                                                                                                                     |                                     |                                                                                                                | H                         | -1.463814 | -2.145089 | -0.926956 |
|                                                                                                                                                                     |                                     |                                                                                                                | B                         | 0.000000  | 0.341446  | 0.000000  |
|                                                                                                                                                                     |                                     |                                                                                                                | S                         | 1.558364  | 0.759803  | 0.000000  |
| i2(C <sub>1</sub> , <sup>2</sup> A)<br>                                          | 37.16581,<br>2.38014,<br>2.26782    | 116, 150, 313, 483, 636,<br>671, 984, 986, 1096,<br>1273, 1390, 1462, 1472,<br>1507, 2996, 3028, 3108,<br>3132 | C                         | -1.192261 | 0.581613  | 0.000032  |
|                                                                                                                                                                     |                                     |                                                                                                                | C                         | -2.313527 | -0.403130 | 0.000050  |
|                                                                                                                                                                     |                                     |                                                                                                                | H                         | -1.478566 | 1.629322  | 0.000774  |
|                                                                                                                                                                     |                                     |                                                                                                                | H                         | -2.955471 | -0.255271 | 0.874895  |



|                                                                                                                                |                                  |                                                                                                                   |                                                                                                                                                                                                                                                                            |
|--------------------------------------------------------------------------------------------------------------------------------|----------------------------------|-------------------------------------------------------------------------------------------------------------------|----------------------------------------------------------------------------------------------------------------------------------------------------------------------------------------------------------------------------------------------------------------------------|
|                                                                                                                                |                                  |                                                                                                                   | H -2.956441 -0.254419 -0.873948<br>B 0.241280 0.249866 -0.000723<br>S 1.824176 -0.125323 0.000126<br>H -1.968010 -1.434686 -0.000620                                                                                                                                       |
| tsi1i2(C <sub>1</sub> , <sup>2</sup> A)<br>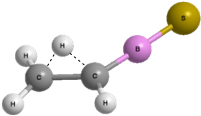   | 38.95225,<br>2.40429,<br>2.28900 | 1667 i, 155, 254, 480,<br>494, 662, 709, 781, 995,<br>1110, 1204, 1281, 1447,<br>1522, 2212, 3149, 3165,<br>3282  | C 1.228772 0.545375 -0.018673<br>C 2.331160 -0.447359 -0.051142<br>H 1.530947 1.574225 -0.177467<br>H 1.780173 0.157504 1.032278<br>H 3.340465 -0.112823 -0.224874<br>H 2.109630 -1.501865 -0.029335<br>B -0.227255 0.228973 -0.028917<br>S -1.811533 -0.115625 -0.002320  |
| tsi1p1(C <sub>1</sub> , <sup>2</sup> A)<br> | 31.82791,<br>2.53075,<br>2.40875 | 1167 i, 158, 241, 342,<br>451, 490, 627, 682,<br>1043, 1054, 1098, 1302,<br>1402, 1517, 1640, 3188,<br>3199, 3291 | C -1.320564 0.472102 -0.167058<br>C -2.214106 -0.503399 0.034087<br>H -1.041966 1.414966 1.421726<br>H -1.657362 1.413604 -0.584803<br>H -3.270959 -0.342261 -0.124275<br>H -1.913497 -1.477475 0.392381<br>B 0.180235 0.206068 -0.066627<br>S 1.761914 -0.115712 0.001621 |
| tsi2p1(C <sub>1</sub> , <sup>2</sup> A)<br> | 30.51581,<br>2.40463,<br>2.31907 | 275 i, 128, 170, 196,<br>307, 491, 637, 673,<br>1005, 1024, 1044, 1299,<br>1385, 1498, 1636, 3127,<br>3137, 3221  | C -1.226711 -0.581336 0.090181<br>C -2.201918 0.256884 -0.294611<br>H -1.50626 -1.563522 0.460087<br>H -3.243184 -0.036917 -0.272797<br>H -2.870442 1.477714 1.622451<br>B 0.238811 -0.234296 0.042218                                                                     |

|                                                                                                                            |                                  |                                                                                              |                                                                                                                                                                                                                                           |
|----------------------------------------------------------------------------------------------------------------------------|----------------------------------|----------------------------------------------------------------------------------------------|-------------------------------------------------------------------------------------------------------------------------------------------------------------------------------------------------------------------------------------------|
|                                                                                                                            |                                  |                                                                                              | S 1.811481 0.125054 -0.006434<br>H -1.986088 1.240056 -0.691310                                                                                                                                                                           |
| <p>p1(C<sub>s</sub>,<sup>1</sup>A')</p> 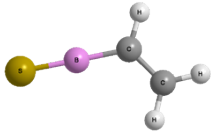  | 46.31679,<br>2.56772,<br>2.43284 | 165, 276, 491, 621, 673,<br>1015, 1034, 1043, 1302,<br>1394, 1500, 1661, 3125,<br>3134, 3215 | C 1.380472 -0.344007 0.000000<br>C 1.603936 -1.662236 0.000000<br>H 2.234667 0.327127 0.000000<br>H 2.607425 -2.069033 0.000000<br>H 0.793015 -2.379257 0.000000<br>B 0.000000 0.264307 0.000000<br>S -1.471347 0.927318 0.000000         |
| <p>p2(C<sub>1</sub>,<sup>1</sup>A)</p>    | 93.44808,<br>2.22349,<br>2.19996 | 110, 159, 355, 369, 581,<br>668, 1038, 1178, 1305,<br>1339, 1504, 1583, 2893,<br>2986, 3042  | C -1.179583 -0.387281 -0.024438<br>C -2.503236 0.151444 -0.021832<br>H -2.646184 1.133386 -0.487173<br>H -2.627826 0.327437 1.069224<br>B 0.213366 -0.082095 -0.009372<br>S 1.850323 0.056837 0.002177<br>H -3.301070 -0.544713 -0.292407 |
| <p>p3(C<sub>1</sub>,<sup>1</sup>A)</p>  | 13.47689,<br>5.14736,<br>4.11656 | 130, 202, 393, 609, 679,<br>749, 972, 993, 1042,<br>1300, 1416, 1632, 3144,<br>3185, 3237    | C 0.743702 -0.479716 0.324985<br>C 1.725114 0.231389 -0.221297<br>H 1.560796 0.899568 -1.053824<br>H 0.911600 -1.146414 1.159021<br>H 2.735940 0.137480 0.154385<br>B -0.891830 1.401013 0.368081<br>S -0.972630 -0.337858 -0.170132      |

Table S5. The RRKM rate constants ( $s^{-1}$ ) computed with B3LYP/cc-pVTZ frequencies and CCSD(T)/cc-pVTZ energies at collision energies of 0.0, 0.1, 0.6, 8.4, 18.0, 21.0, and 41.8 kJ/mol, in the reaction of boron monosulfide (BS;  $X^2\Sigma^+$ ) with ethylene ( $C_2H_4$ ;  $X^1A_g$ ).

|                                  | 0.0                | 0.1                | 0.6                | 8.4                | 18.0               | 21.0               | 41.8               |
|----------------------------------|--------------------|--------------------|--------------------|--------------------|--------------------|--------------------|--------------------|
| $k_I(i1 \rightarrow ts-i1i2)$    | $1.20 \times 10^8$ | $1.21 \times 10^8$ | $1.26 \times 10^8$ | $2.29 \times 10^8$ | $4.36 \times 10^8$ | $5.20 \times 10^8$ | $1.54 \times 10^9$ |
| $k_{-I}(i2 \rightarrow ts-i1i2)$ | $3.67 \times 10^7$ | $3.72 \times 10^7$ | $3.89 \times 10^7$ | $7.49 \times 10^7$ | $1.53 \times 10^8$ | $1.86 \times 10^8$ | $6.30 \times 10^8$ |
| $k_2(i1 \rightarrow ts-i1p1)$    | $1.92 \times 10^6$ | $1.96 \times 10^6$ | $2.14 \times 10^6$ | $7.14 \times 10^6$ | $2.35 \times 10^7$ | $3.22 \times 10^7$ | $1.99 \times 10^8$ |
| $k_3(i2 \rightarrow ts-i2p1)$    | $3.52 \times 10^7$ | $3.58 \times 10^7$ | $3.82 \times 10^7$ | $9.64 \times 10^7$ | $2.56 \times 10^8$ | $3.34 \times 10^8$ | $1.66 \times 10^9$ |
